# Supplementary material for: Quantitative Proteogenomic Characterization of Inflamed Murine Colon Tissue Using an Integrated Discovery, Verification, and Validation Proteogenomic Workflow
Source: MDPI journal article supplement (doi:10.3390/proteomes10020011), 2022-04-14

# Supporting information for “Quantitative Proteogenomic Characterization of Inflamed Murine Colon Tissue Using an Integrated Discovery, Verification, and Validation Proteogenomic Workflow”

Andrew T. Rajczewski <sup>1</sup>, Qiyuan Han <sup>1</sup>, Subina Mehta <sup>1</sup>, Praveen Kumar <sup>1</sup>, Pratik D. Jagtap <sup>1</sup>, Charles G. Knutson <sup>2</sup>, James G. Fox <sup>2</sup>, Natalia Y. Tretyakova <sup>3</sup> and Timothy J. Griffin <sup>1,\*</sup>

<sup>1</sup> Department of Biochemistry, Molecular Biology and Biophysics, University of Minnesota, Minneapolis, MN 55455, USA; rajcz001@umn.edu (A.T.R.); hanxx963@umn.edu (Q.H.); smehta@umn.edu (S.M.); prav33683@gmail.com (P.K.); pjagtap@umn.edu (P.D.J.)

<sup>2</sup> Department of Biological Engineering, Massachusetts Institute of Technology, Cambridge, MA 02139, USA; charlie.knutson@novartis.com (C.G.K.); jgfox@mit.edu (J.G.F.)

<sup>3</sup> Department of Medicinal Chemistry, the Masonic Cancer Center, University of Minnesota, Minneapolis, MN 55455, USA; trety001@umn.edu

\* Correspondence: tgriffin@umn.edu

## Table of Contents

|                                                                                      |      |
|--------------------------------------------------------------------------------------|------|
| Table S1: Proximal colon samples.....                                                | S-2  |
| Table S2: Inclusion list for targeted detection of non-canonical peptides.....       | S-3  |
| Table S3: Non-canonical peptide sequences.....                                       | S-7  |
| Table S4: Human parallels of mouse non-canonical peptides.....                       | S-9  |
| Figure S1: Genomic coordinated of protein enriched in inflamed colon samples.....    | S-10 |
| Figure S2: MS/MS spectra of non-canonical peptides passing PepQuery validation ..... | S-11 |
| Figure S3: Genomic coordinates of non-canonical peptide AASSANIPK .....              | S-14 |
| Figure S4: Genomic coordinates of non-canonical peptide AASSANIPK.....               | S-15 |

**Table S1: Proximal colon samples.** Proximal colon samples used in this study, with the sample accession numbers, animal identification numbers, nature of the tissue, and the tandem mass tag mass assigned in LC-MS experiments. Accession numbers and animal identification numbers were assigned by the Tannenbaum lab, where the samples were first generated and harvested for future analysis.

| Accession # | Mouse ID | Sample Type          | TMT-6plex label |
|-------------|----------|----------------------|-----------------|
| 12-5632     | 5812     | Control              | 126             |
| 12-5633     | 5813     | Control              | 127             |
| 12-5634     | 5833     | Control              | 128             |
| 12-5646     | 5874     | H hepaticus infected | 129             |
| 12-5647     | 5819     | H hepaticus infected | 130             |
| 12-5648     | 5820     | H hepaticus infected | 131             |

**Table S2: Inclusion list for targeted detection of non-canonical peptides in proximal colon samples.**  
Based on the initial global proteomics data, m/z values and charge states were determined for putative non-canonical peptides and used to create this inclusion list for targeted PRM analyses.

| Mass [m/z] | CS [z] | Polarity | Detection Start [min] | Detection End [min] | (N)CE | (N)CE type | Comment             |
|------------|--------|----------|-----------------------|---------------------|-------|------------|---------------------|
| 401.91379  | 3      | Positive | 31.59                 | 46.59               | 35    | NCE        | aSLQVSTLR           |
| 411.58926  | 3      | Positive | 38.71                 | 53.71               | 35    | NCE        | dSILQAK             |
| 417.92569  | 3      | Positive | 48.28                 | 63.28               | 35    | NCE        | aEPGLPLGLR          |
| 423.2294   | 3      | Positive | 49                    | 64                  | 35    | NCE        | dPsAIGk             |
| 436.7355   | 4      | Positive | 36.75                 | 51.75               | 35    | NCE        | ssVRIGSGSWk         |
| 446.49326  | 4      | Positive | 42.84                 | 57.84               | 35    | NCE        | iLGAILAMASTQsR      |
| 446.49326  | 4      | Positive | 42.84                 | 57.84               | 35    | NCE        | iLGAILAMASTQSR      |
| 448.62711  | 3      | Positive | 52.49                 | 67.49               | 35    | NCE        | ILGIDLGGk           |
| 466.93878  | 3      | Positive | 37.24                 | 52.24               | 35    | NCE        | aPPTWPGSk           |
| 472.79034  | 2      | Positive | 34.13                 | 49.13               | 35    | NCE        | ISANLR              |
| 472.79095  | 2      | Positive | 37.12                 | 52.12               | 35    | NCE        | ISANLR              |
| 480.94556  | 3      | Positive | 37.94                 | 52.94               | 35    | NCE        | aPPTWPGSk           |
| 484.29071  | 3      | Positive | 60.79                 | 75.79               | 35    | NCE        | ePILtVLk            |
| 484.29514  | 3      | Positive | 51.78                 | 66.78               | 35    | NCE        | ePILtVLk            |
| 491.6076   | 3      | Positive | 57.64                 | 72.64               | 35    | NCE        | qVIyELk             |
| 491.60995  | 3      | Positive | 57.68                 | 72.68               | 35    | NCE        | qVIyELk             |
| 491.61108  | 3      | Positive | 58.19                 | 73.19               | 35    | NCE        | qVIyELk             |
| 491.97314  | 3      | Positive | 50.25                 | 65.25               | 35    | NCE        | vMPILLDSk           |
| 498.2988   | 3      | Positive | 59.58                 | 74.58               | 35    | NCE        | ePILtVLk            |
| 501.95837  | 3      | Positive | 49.67                 | 64.67               | 35    | NCE        | eEEGLEVLk           |
| 502.27893  | 3      | Positive | 36                    | 51                  | 35    | NCE        | iTEHsIPk            |
| 507.60172  | 3      | Positive | 57.31                 | 72.31               | 35    | NCE        | aPPTWPGSk           |
| 507.60608  | 3      | Positive | 43.38                 | 58.38               | 35    | NCE        | aPPTWPGSk           |
| 507.96249  | 3      | Positive | 51.86                 | 66.86               | 35    | NCE        | qMINLTESk           |
| 508.80139  | 2      | Positive | 39.06                 | 54.06               | 35    | NCE        | iTNLER              |
| 508.80185  | 2      | Positive | 37.78                 | 52.78               | 35    | NCE        | iTNLER              |
| 512.30438  | 3      | Positive | 53.21                 | 68.21               | 35    | NCE        | eVmLVGIGDk          |
| 515.62384  | 3      | Positive | 50.35                 | 65.35               | 35    | NCE        | dLSLEGPEGk          |
| 520.30646  | 3      | Positive | 40.46                 | 55.46               | 35    | NCE        | qHFPSMILk           |
| 520.31342  | 3      | Positive | 39.32                 | 54.32               | 35    | NCE        | qHFPSMILk           |
| 525.6405   | 3      | Positive | 59.44                 | 74.44               | 35    | NCE        | qHFPSmILk           |
| 532.32422  | 2      | Positive | 34.02                 | 49.02               | 35    | NCE        | tSSISALR            |
| 532.32428  | 2      | Positive | 36.54                 | 51.54               | 35    | NCE        | tSSISALR            |
| 534.06195  | 4      | Positive | 64.43                 | 79.43               | 35    | NCE        | skPcISGLMVPEk       |
| 538.32654  | 2      | Positive | 2.83                  | 17.83               | 35    | NCE        | iFSLNPR             |
| 538.68396  | 3      | Positive | 62.27                 | 77.27               | 35    | NCE        | ISANLRLLQk          |
| 547.97961  | 3      | Positive | 49.92                 | 64.92               | 35    | NCE        | iFsLNPRSk           |
| 553.32477  | 2      | Positive | 37.54                 | 52.54               | 35    | NCE        | tSSISALR            |
| 554.05615  | 4      | Positive | 61.25                 | 76.25               | 35    | NCE        | skPcIsGLMVPEk       |
| 554.05646  | 4      | Positive | 60.61                 | 75.61               | 35    | NCE        | skPcIsGLMVPEk       |
| 556.00024  | 3      | Positive | 53.53                 | 68.53               | 35    | NCE        | skPAItGPk           |
| 559.3717   | 2      | Positive | 40.09                 | 55.09               | 35    | NCE        | iLQLVFR             |
| 559.37177  | 2      | Positive | 39.57                 | 54.57               | 35    | NCE        | iLQLVFR             |
| 561.2959   | 3      | Positive | 66.82                 | 81.82               | 35    | NCE        | wTSEFEASLINR        |
| 561.29816  | 3      | Positive | 67.18                 | 82.18               | 35    | NCE        | wTSEFEASLINR        |
| 561.2984   | 3      | Positive | 67.61                 | 82.61               | 35    | NCE        | wTSEFEASLINR        |
| 561.29858  | 3      | Positive | 67.35                 | 82.35               | 35    | NCE        | wTSEFEASLINR        |
| 561.29871  | 3      | Positive | 67.09                 | 82.09               | 35    | NCE        | wTSEFEASLINR        |
| 564.30493  | 3      | Positive | 53.33                 | 68.33               | 35    | NCE        | dIELVmAQANVSR       |
| 564.82117  | 4      | Positive | 56.45                 | 71.45               | 35    | NCE        | pIRPGHYFPASPTAVHAIR |
| 566.3244   | 3      | Positive | 49.81                 | 64.81               | 35    | NCE        | fSmVVQDGIVk         |
| 566.32886  | 3      | Positive | 54.31                 | 69.31               | 35    | NCE        | fSmVVQDGIVk         |

|           |   |          |       |       |    |     |                   |
|-----------|---|----------|-------|-------|----|-----|-------------------|
| 572.29749 | 2 | Positive | 45.95 | 60.95 | 35 | NCE | tsSISALR          |
| 572.29749 | 2 | Positive | 45.95 | 60.95 | 35 | NCE | tSsISALR          |
| 572.29749 | 2 | Positive | 45.95 | 60.95 | 35 | NCE | tSSISALR          |
| 573.35065 | 2 | Positive | 33.77 | 48.77 | 35 | NCE | dPSAIGk           |
| 573.35089 | 2 | Positive | 36.48 | 51.48 | 35 | NCE | dPSAIGk           |
| 573.35095 | 2 | Positive | 36.3  | 51.3  | 35 | NCE | dPSAIGk           |
| 573.35175 | 2 | Positive | 35.75 | 50.75 | 35 | NCE | dPSAIGk           |
| 574.89465 | 2 | Positive | 55.83 | 70.83 | 35 | NCE | fVVAIk            |
| 574.89545 | 2 | Positive | 58.63 | 73.63 | 35 | NCE | fVVAIk            |
| 574.99872 | 3 | Positive | 42.6  | 57.6  | 35 | NCE | fSMVVQDGIVk       |
| 580.97656 | 3 | Positive | 43    | 58    | 35 | NCE | iLGAILAMAsTQSR    |
| 580.97656 | 3 | Positive | 43    | 58    | 35 | NCE | iLGAILAMAsTQSR    |
| 582.38208 | 2 | Positive | 49.62 | 64.62 | 35 | NCE | aGAVFLk           |
| 582.38281 | 2 | Positive | 46.6  | 61.6  | 35 | NCE | aGAVFLk           |
| 582.65967 | 3 | Positive | 39.77 | 54.77 | 35 | NCE | skPAItGPk         |
| 582.85614 | 2 | Positive | 45.1  | 60.1  | 35 | NCE | fPDTVv            |
| 586.31213 | 3 | Positive | 50.98 | 65.98 | 35 | NCE | iLGAILAmAsTQSR    |
| 586.31213 | 3 | Positive | 50.98 | 65.98 | 35 | NCE | iLGAILAmAsTQSR    |
| 586.31213 | 3 | Positive | 50.98 | 65.98 | 35 | NCE | iLGAILAmASTQsR    |
| 586.31317 | 3 | Positive | 52.02 | 67.02 | 35 | NCE | iLGAILAmAsTQSR    |
| 586.31317 | 3 | Positive | 52.02 | 67.02 | 35 | NCE | iLGAILAmAsTQSR    |
| 586.3418  | 2 | Positive | 10.23 | 25.23 | 35 | NCE | aNNINIQR          |
| 592.32434 | 2 | Positive | 46.47 | 61.47 | 35 | NCE | nPTsVv            |
| 592.32434 | 2 | Positive | 46.47 | 61.47 | 35 | NCE | nPtSVv            |
| 594.99884 | 3 | Positive | 57.77 | 72.77 | 35 | NCE | iQStNQILEAk       |
| 594.99884 | 3 | Positive | 57.77 | 72.77 | 35 | NCE | iQsTNQILEAk       |
| 599.3103  | 2 | Positive | 46.03 | 61.03 | 35 | NCE | iFsLNPR           |
| 603.38831 | 2 | Positive | 48.39 | 63.39 | 35 | NCE | aGAVFLk           |
| 605.5661  | 4 | Positive | 55.14 | 70.14 | 35 | NCE | nPTSVkYVEMsSVFHR  |
| 606.992   | 3 | Positive | 65.75 | 80.75 | 35 | NCE | fsmVVQDGIVk       |
| 607.35724 | 3 | Positive | 37.86 | 52.86 | 35 | NCE | aGPGRPAAAGGAAVRRR |
| 609.56299 | 4 | Positive | 55.21 | 70.21 | 35 | NCE | nPtSVkYVEMsSVFHR  |
| 609.56311 | 4 | Positive | 51.65 | 66.65 | 35 | NCE | nPtSVkYVEMsSVFHR  |
| 613.33069 | 2 | Positive | 56.48 | 71.48 | 35 | NCE | dPsAIGk           |
| 613.33521 | 2 | Positive | 49.48 | 64.48 | 35 | NCE | dPsAIGk           |
| 613.33521 | 2 | Positive | 49.48 | 64.48 | 35 | NCE | nPtSVv            |
| 613.33521 | 2 | Positive | 49.48 | 64.48 | 35 | NCE | nPTsVv            |
| 613.33813 | 2 | Positive | 48.97 | 63.97 | 35 | NCE | dPsAIGk           |
| 616.85022 | 2 | Positive | 66.38 | 81.38 | 35 | NCE | sAPLLLGP          |
| 616.88525 | 2 | Positive | 37.28 | 52.28 | 35 | NCE | dSILQAk           |
| 616.88544 | 2 | Positive | 40.03 | 55.03 | 35 | NCE | dSILQAk           |
| 634.33527 | 2 | Positive | 5.67  | 20.67 | 35 | NCE | dPsAIGk           |
| 634.33765 | 2 | Positive | 39.9  | 54.9  | 35 | NCE | dPsAIGk           |
| 637.88483 | 2 | Positive | 43.44 | 58.44 | 35 | NCE | dSILQAk           |
| 637.88605 | 2 | Positive | 44.69 | 59.69 | 35 | NCE | dSILQAk           |
| 637.89258 | 2 | Positive | 43.04 | 58.04 | 35 | NCE | dSILQAk           |
| 638.3465  | 2 | Positive | 38.01 | 53.01 | 35 | NCE | hQsALVRR          |
| 638.34955 | 2 | Positive | 49.25 | 64.25 | 35 | NCE | hQsALVRR          |
| 638.34967 | 2 | Positive | 43.96 | 58.96 | 35 | NCE | hQsALVRR          |
| 638.35046 | 3 | Positive | 63.8  | 78.8  | 35 | NCE | iLGAILAmAsTQsRR   |
| 638.35046 | 3 | Positive | 63.8  | 78.8  | 35 | NCE | iLGAILAmAsTQsRR   |
| 638.35046 | 3 | Positive | 63.8  | 78.8  | 35 | NCE | iLGAILAmASTQsRR   |
| 652.71063 | 3 | Positive | 64.41 | 79.41 | 35 | NCE | vVLLGLsSIPSLVGHR  |
| 652.71063 | 3 | Positive | 64.41 | 79.41 | 35 | NCE | vVLLGLsSIPSLVGHR  |
| 652.71124 | 3 | Positive | 64.06 | 79.06 | 35 | NCE | vVLLGLsSIPSLVGHR  |
| 652.71124 | 3 | Positive | 64.06 | 79.06 | 35 | NCE | vVLLGLsSIPSLVGHR  |
| 658.896   | 2 | Positive | 41.94 | 56.94 | 35 | NCE | aASSANIPk         |
| 658.89929 | 2 | Positive | 51.87 | 66.87 | 35 | NCE | aASSANIPk         |
| 658.90131 | 2 | Positive | 36.53 | 51.53 | 35 | NCE | aASSANIPk         |
| 672.43634 | 2 | Positive | 51.71 | 66.71 | 35 | NCE | iLGIDLGGk         |

|           |   |          |       |        |    |     |                         |
|-----------|---|----------|-------|--------|----|-----|-------------------------|
| 672.4375  | 2 | Positive | 54.69 | 69.69  | 35 | NCE | ILGIDLGGk               |
| 672.43762 | 2 | Positive | 51.01 | 66.01  | 35 | NCE | ILGIDLGGk               |
| 672.43805 | 2 | Positive | 52.45 | 67.45  | 35 | NCE | ILGIDLGGk               |
| 675.922   | 2 | Positive | 64.87 | 79.87  | 35 | NCE | qVIYELk                 |
| 679.69513 | 3 | Positive | 36.75 | 51.75  | 35 | NCE | aRPVSSAASVYAGAGGSGSR    |
| 685.95459 | 2 | Positive | 57.54 | 72.54  | 35 | NCE | ePILTVLk                |
| 685.96118 | 2 | Positive | 50.13 | 65.13  | 35 | NCE | ePILTVLk                |
| 697.37695 | 3 | Positive | 56.46 | 71.46  | 35 | NCE | aAAAAAAAAAAAAASHsVak    |
| 697.37695 | 3 | Positive | 56.46 | 71.46  | 35 | NCE | aAAAAAAAAAAAAAsHSVak    |
| 699.9046  | 2 | Positive | 37.32 | 52.32  | 35 | NCE | aPPTWPGSk               |
| 699.91199 | 2 | Positive | 45.54 | 60.54  | 35 | NCE | aPPTWPGSk               |
| 699.91302 | 2 | Positive | 50.85 | 65.85  | 35 | NCE | aPPTWPGSk               |
| 701.12836 | 4 | Positive | 55.4  | 70.4   | 35 | NCE | vLNGPEGDGVPEAVVhLNNQIk  |
| 704.37402 | 2 | Positive | 46.97 | 61.97  | 35 | NCE | sLAALPEELR              |
| 716.38727 | 2 | Positive | 34.14 | 49.14  | 35 | NCE | yANNNSkY                |
| 716.39734 | 2 | Positive | 48.99 | 63.99  | 35 | NCE | rHQsALVRR               |
| 719.88727 | 2 | Positive | 47.45 | 62.45  | 35 | NCE | aASsANIPk               |
| 719.88727 | 2 | Positive | 47.45 | 62.45  | 35 | NCE | aAsSANIPk               |
| 720.35889 | 3 | Positive | 42.24 | 57.24  | 35 | NCE | aRPVsSsAASVYAGAGGSGSR   |
| 720.35889 | 3 | Positive | 42.24 | 57.24  | 35 | NCE | aRPVsSAASVYAGAGGSGSR    |
| 725.9325  | 2 | Positive | 60.62 | 75.62  | 35 | NCE | ePILtVLk                |
| 725.93677 | 2 | Positive | 51.71 | 66.71  | 35 | NCE | ePILtVLk                |
| 726.39618 | 2 | Positive | 41.09 | 56.09  | 35 | NCE | aMADELSEk               |
| 731.90918 | 2 | Positive | 49.45 | 64.45  | 35 | NCE | iTEHsIPk                |
| 734.38593 | 2 | Positive | 61.01 | 76.01  | 35 | NCE | amADELSEk               |
| 736.90778 | 2 | Positive | 53.64 | 68.64  | 35 | NCE | qVIyELk                 |
| 736.91187 | 2 | Positive | 58.47 | 73.47  | 35 | NCE | qVIyELk                 |
| 736.91193 | 2 | Positive | 58.13 | 73.13  | 35 | NCE | qVIyELk                 |
| 736.9649  | 2 | Positive | 41.2  | 56.2   | 35 | NCE | eLkEVIQR                |
| 737.39844 | 2 | Positive | 37.31 | 52.31  | 35 | NCE | rHQsALVRR               |
| 737.45685 | 2 | Positive | 50.15 | 65.15  | 35 | NCE | vMPILLDSk               |
| 745.45398 | 2 | Positive | 49.12 | 64.12  | 35 | NCE | vmPILLDSk               |
| 747.37585 | 4 | Positive | 57.2  | 72.2   | 35 | NCE | tGDFQLHTNVNDGTEFGGSIYQk |
| 747.38037 | 4 | Positive | 71.19 | 86.19  | 35 | NCE | tGDFQLHTNVNDGTEFGGSIYQk |
| 751.92773 | 2 | Positive | 51.69 | 66.69  | 35 | NCE | dLSLEGPEGk              |
| 752.91663 | 2 | Positive | 47.04 | 62.04  | 35 | NCE | itEHSIPk                |
| 759.95209 | 2 | Positive | 50.49 | 65.49  | 35 | NCE | eVMLVGIGDk              |
| 767.38489 | 4 | Positive | 73.23 | 88.23  | 35 | NCE | lcYVALDFEQEMAMVASSSSLEk |
| 779.40741 | 3 | Positive | 64.94 | 79.94  | 35 | NCE | pIRPGHyPASSPTAVHAIR     |
| 787.37225 | 4 | Positive | 74.06 | 89.06  | 35 | NCE | lcYVALDFEQEMAMVASSSSLEk |
| 787.37384 | 4 | Positive | 72.95 | 87.95  | 35 | NCE | lcYVALDFEQEMAMVAsSSSLEk |
| 787.37384 | 4 | Positive | 72.95 | 87.95  | 35 | NCE | lcYVALDFEQEMAMVASsSSLEk |
| 787.37384 | 4 | Positive | 72.95 | 87.95  | 35 | NCE | lcYVALDFEQEMAMVASSSSLEk |
| 787.37543 | 4 | Positive | 73.48 | 88.48  | 35 | NCE | lcYVALDFEQEMAMVASSSSLEk |
| 791.37518 | 4 | Positive | 70.55 | 85.55  | 35 | NCE | lcYVALDFEQEmAMVASSSSLEk |
| 791.37518 | 4 | Positive | 70.55 | 85.55  | 35 | NCE | lcYVALDFEQEMAmVASSSSLEk |
| 791.37524 | 4 | Positive | 70.53 | 85.53  | 35 | NCE | lcYVALDFEQEMAmVASsSSLEk |
| 791.3764  | 4 | Positive | 70.67 | 85.67  | 35 | NCE | lcYVALDFEQEmAMVASSSSLEk |
| 791.3764  | 4 | Positive | 70.67 | 85.67  | 35 | NCE | lcYVALDFEQEMAmVASSSSLEk |
| 791.37866 | 4 | Positive | 73.49 | 88.49  | 35 | NCE | lcYVALDFEQEmAMVASSSSLEk |
| 791.37866 | 4 | Positive | 73.49 | 88.49  | 35 | NCE | lcYVALDFEQEMAmVASSSSLEk |
| 807.52252 | 2 | Positive | 62.4  | 77.4   | 35 | NCE | ISANLRLlQk              |
| 811.48035 | 2 | Positive | 37.71 | 52.71  | 35 | NCE | sSVRIGSGSwk             |
| 820.06818 | 3 | Positive | 55.43 | 70.43  | 35 | NCE | pIRPGHYPASsPtAVHAIR     |
| 821.80524 | 3 | Positive | 84.38 | 99.38  | 35 | NCE | vHAELADVLTEVVVDSVLAVR   |
| 821.80615 | 3 | Positive | 85.05 | 100.05 | 35 | NCE | vHAELADVLTEVVVDSVLAVR   |
| 821.80652 | 3 | Positive | 84.89 | 99.89  | 35 | NCE | vHAELADVLTEVVVDSVLAVR   |
| 833.50031 | 2 | Positive | 53.53 | 68.53  | 35 | NCE | skPAItGPK               |
| 833.50031 | 2 | Positive | 53.53 | 68.53  | 35 | NCE | skPAITGPK               |
| 840.99542 | 2 | Positive | 58.94 | 73.94  | 35 | NCE | fSMVVQDGIVk             |

|            |   |          |       |       |    |     |                         |
|------------|---|----------|-------|-------|----|-----|-------------------------|
| 841.44312  | 2 | Positive | 66.86 | 81.86 | 35 | NCE | wTSEFEASLINR            |
| 841.44318  | 2 | Positive | 67.64 | 82.64 | 35 | NCE | wTSEFEASLINR            |
| 841.44366  | 2 | Positive | 67.1  | 82.1  | 35 | NCE | wTSEFEASLINR            |
| 841.44452  | 2 | Positive | 67.39 | 82.39 | 35 | NCE | wTSEFEASLINR            |
| 845.95221  | 2 | Positive | 53.45 | 68.45 | 35 | NCE | dIELVmAQANVSR           |
| 848.9881   | 2 | Positive | 54.24 | 69.24 | 35 | NCE | fSmVVQDGIVk             |
| 852.01007  | 2 | Positive | 46.95 | 61.95 | 35 | NCE | iQSTNQILEAk             |
| 856.9527   | 2 | Positive | 49.7  | 64.7  | 35 | NCE | aSLQVStLRLeR            |
| 856.9527   | 2 | Positive | 49.7  | 64.7  | 35 | NCE | aSLQVsTLRLcR            |
| 870.96143  | 2 | Positive | 43.01 | 58.01 | 35 | NCE | iLGAILAMAsTQSR          |
| 873.51385  | 2 | Positive | 50.85 | 65.85 | 35 | NCE | IAHLILsLEAk             |
| 921.84399  | 3 | Positive | 62.36 | 77.36 | 35 | NCE | vLNGPEGDGVPEAVVTLNNQIk  |
| 922.46405  | 3 | Positive | 68.16 | 83.16 | 35 | NCE | yVALDFEQEMAMAASSSSLEk   |
| 927.7923   | 3 | Positive | 71.23 | 86.23 | 35 | NCE | yVALDFEQEMAmAASSSSLEk   |
| 927.7923   | 3 | Positive | 71.23 | 86.23 | 35 | NCE | yVALDFEQEmAMAASSSSLEk   |
| 933.12366  | 3 | Positive | 67.17 | 82.17 | 35 | NCE | yVALDFEQEmAmAASSSSLEk   |
| 934.50049  | 3 | Positive | 55.09 | 70.09 | 35 | NCE | vLNGPEGDGVPEAVVTLNNQIk  |
| 941.79236  | 3 | Positive | 70.87 | 85.87 | 35 | NCE | yVALDFEQEMAmAASSSSLEk   |
| 941.79236  | 3 | Positive | 70.87 | 85.87 | 35 | NCE | yVALDFEQEmAMAASSSSLEk   |
| 999.16479  | 3 | Positive | 81.56 | 96.56 | 35 | NCE | cYVALDFEQEMAMVASSSSLEk  |
| 1022.84576 | 3 | Positive | 73.46 | 88.46 | 35 | NCE | lcYVALDFEQEMAMVASSSSLEk |
| 1036.85205 | 3 | Positive | 73.56 | 88.56 | 35 | NCE | lcYVALDFEQEMAMVASSSSLEk |
| 1049.49646 | 3 | Positive | 73.28 | 88.28 | 35 | NCE | lcyVALDFEQEMAMVASSSSLEk |
| 1049.49756 | 3 | Positive | 73.48 | 88.48 | 35 | NCE | lcyVALDFEQEMAMVASSSSLEk |
| 1049.4989  | 3 | Positive | 74.82 | 89.82 | 35 | NCE | lcYVALDFEQEMAMVAsSSSLEk |
| 1049.505   | 3 | Positive | 75.33 | 90.33 | 35 | NCE | lcyVALDFEQEMAMVASSSSLEk |
| 1054.83679 | 3 | Positive | 76.04 | 91.04 | 35 | NCE | lcYVALDFEQEMAmVAsSSSLEk |
| 1060.17273 | 3 | Positive | 74.55 | 89.55 | 35 | NCE | lcYVALDFEQEmAmVAsSSSLEk |
| 1060.17273 | 3 | Positive | 74.55 | 89.55 | 35 | NCE | lcyVALDFEQEmAmVASSSSLEk |
| 1063.49658 | 3 | Positive | 62.88 | 77.88 | 35 | NCE | lcYVALDFEQEMAMVASSSsLEk |
| 1068.83069 | 3 | Positive | 58.57 | 73.57 | 35 | NCE | lcYVALDFEQEMAmVASSSsLEk |
| 1108.03918 | 2 | Positive | 57.93 | 72.93 | 35 | NCE | ntPQLADIVATGFSVcGR      |

**Table S3: Non-canonical peptide sequences.** Non-canonical sequence peptides identified, validated, and quantified in inflamed proximal colon tissues. Peptide precursors with at least three product ions (b- and/or y-ions) were detected in Skyline. A weighted contrast angle of the MS/MS spectra peaks against those of the reference library is reported in Skyline as the dot product, with a score of 1.0 representing a perfect match and 0.0 representing no match

| Peptide                      | Gene/Genetic Coordinates              | Phosphorylated | Detected in Targeted | Skyline Dot Product |
|------------------------------|---------------------------------------|----------------|----------------------|---------------------|
| AAAAAAAAAAAAASHSVAK          | Slc4a4                                |                | X                    | 0.65                |
| AASSANIPK                    | Sorl1                                 |                | X                    | 0.47                |
| AEPGLPLGLR                   | Sec1                                  |                | X                    | 0.86                |
| AGAVFLK                      | chr7:30972023-30972044                |                |                      |                     |
| AGPGRPAAAGGAARRR             | Clstn1                                |                |                      |                     |
| AMADELSEK                    | Nucb2                                 |                |                      |                     |
| APPTWPGSK                    | Slc1a5                                |                | X                    | 0.41                |
| ARPVSSAASVYAGAGGSGSR         | Akap6                                 |                | X                    | 0.47                |
| ASLQVSTLRLCR                 | Zfp219                                | x              | X                    | 0.71                |
| CYVALDFEQEMAMVASSSSLEK       | chr2:130657397-130657463              |                |                      |                     |
| DIELVMAQANVSR                | chr7:45080696-45080735                |                | X                    | 0.78                |
| DIRQMINLTESK                 | Morc3                                 |                |                      |                     |
| DLSLEGPEGK                   | Cenpv                                 |                | X                    | 0.95                |
| DPSAIGK                      | chr4:109689395-109689416              |                | X                    | 0.61                |
| DSILQAKL                     | chrX:5699255-5699279                  |                | X                    | 0.78                |
| EEEGLEVLK                    | Sft2d1                                |                | X                    | 0.77                |
| ELKEVIQR                     | chr9:107846694-107846718              |                |                      |                     |
| EPILTVLK                     | Lamb2                                 |                | X                    | 0.79                |
| EVMLVGIGDK                   | Ppil4                                 |                | X                    | 0.56                |
| FIVAIGK                      | Cpeb2                                 |                |                      |                     |
| FSMVVQDGIVK                  | chr11:64321586-64321619               |                | X                    | 0.61                |
| GHARSSRMNAFPL                | chr9:63755704-63755743                |                |                      |                     |
| GKPVTLLEGGK                  | Rcsd1                                 |                | X                    | 0.64                |
| IFSLNPRSK                    | Cipc                                  | x              | X                    | 0.79                |
| ILGAILAMASTQSRR              | chr12:55637554-55637599               |                | X                    | 0.78                |
| IQSTNQILEAK                  | chr9:90120273-90120306                |                | X                    | 0.76                |
| ITEHSIPK                     | Nol10                                 |                | X                    | 0.81                |
| ITNLERGRER                   | chr17:66549926-66549956               |                | X                    | 0                   |
| KANNINIQR                    | Scaf8                                 |                |                      |                     |
| KILQLVFR                     | chr16:46443630-46443654               |                |                      |                     |
| LAHLILSLEAK                  | chr15_K1270905v1_alt:3773278-31485159 | x              | X                    | 0.43                |
| LCYVALDFEQEMAMVASSSSLEK      | chr2:130657394-130657463              | x              |                      |                     |
| LGTGAMLPLEAVK                | chr4:156226782-156226821              |                | X                    | 0.86                |
| LLGIDLGGK                    | Huwe1                                 |                | X                    | 0.78                |
| LLYAVNTHCHADHITGSGLLR        | chr19:43526299-43526365               |                | X                    | 0.85                |
| LPHLPSILEGRK                 | Adprh12                               |                |                      |                     |
| LQATLQLPQRR                  | Pm20d1                                |                |                      |                     |
| LSANLRLQK                    | chr8:119530648-119530678              | x              | X                    | 0.87                |
| NPTSVKYVEMSSVFHR             | Zfp729b                               |                | X                    | 0.58                |
| NTPQLADIVATGFSVCGRISIRFPDTPK | Gnb11                                 | x              |                      |                     |
| PIRPGHYPASSPTAVHAIR          | chr2:149011574-149011631              | x              | X                    | 0.79                |
| QHFPKMILK                    | chr3:51956696-51956723                |                | X                    | 0.82                |
| QVIYELK                      | Elmo1                                 |                | X                    | 0.75                |
| RHQSAIVRR                    | Cdca4                                 |                |                      |                     |
| SAPLLLGPR                    | Cyp2s1                                |                | X                    | 0.67                |
| SFISLDRVTPR                  | chr4:16146372-16146405                |                |                      |                     |
| SKPAITGPK                    | Fendrr                                |                | X                    | 0.76                |
| SKPCISGLMVPEK                | Glu1                                  |                | X                    | 0.62                |
| SLAALPEELR                   | Fam214a                               |                | X                    | 0.97                |

|                         |                          |   |   |      |
|-------------------------|--------------------------|---|---|------|
| SSVRIGSGSWK             | Adcy5                    |   |   |      |
| TGDFQLHTNVNDGTEFGGSIYQK | Specc11                  |   |   |      |
| TSSISALR                | Tgm7                     |   | X | 0.78 |
| VHAELADVLTEVVVDSVLAVR   | 1110038B12Rik            |   | X | 0.53 |
| VMPILLDSK               | Phkb                     |   | X | 0.61 |
| VVLLGLSSIPSLVGHR        | Fam107b                  | x | X | 0.42 |
| WTSEFEASLINR            | chr14:57578727-57578763  |   | X | 0.81 |
| YANNNSKY                | Depdc5                   |   |   |      |
| YVALDFEQEMAMAASSSLEK    | chr2:130463229-130463292 |   |   |      |



**Table S4: Human parallels of mouse non-canonical peptides.** Human versions of murine non-canonical peptides found in TCGA datasets with PepQuery. Green-highlighted peptides show a decreased abundance in inflamed proximal colon samples while red-highlighted samples show an increased abundance in inflamed proximal colon samples.

| Peptide                | Lifted Human Coordinates | TCGA Colon Cancer | TCGA Breast Cancer | TCGA Breast Cancer PP | TCGA Ovarian | TCGA Ovarian PP | TCGA Ovarian GP | VU CC | PNNL CC | PNNL CC PP |
|------------------------|--------------------------|-------------------|--------------------|-----------------------|--------------|-----------------|-----------------|-------|---------|------------|
| AAAAAAAAAAAAASHS VAK   | chr4:72053029-72053086   |                   |                    | x                     |              |                 |                 |       |         |            |
| ARPVSSAASVYAGAGG SGSR  | chr14:33082441-33082494  |                   | x                  | x                     | x            |                 |                 | x     |         |            |
| ASLQVSTLRLCR           | chr14:21559259-21559295  |                   | x                  |                       | x            |                 |                 |       |         |            |
| ELKEVIQR               | chr3:49159774-49159798   |                   | x                  | x                     | x            | x               |                 |       |         |            |
| FSMVVQDGIVK            | chr17:13665162-13665195  |                   | x                  |                       | x            |                 |                 | x     |         |            |
| LGTGAMLPLEAV K         | chr1:903676-903724       | x                 |                    |                       | x            |                 |                 |       |         | x          |
| LLGIDLGGK              | chrX:53654138-53654205   |                   | x                  | x                     |              |                 |                 | x     |         |            |
| SKPAITGPK              | chr16:86531751-86542270  | x                 | x                  | x                     | x            | x               | x               | x     | x       | x          |
| SKPCISGLMVPEK          | chr1:182357758-182357797 | x                 | x                  | x                     |              |                 |                 |       | x       |            |
| VHAELADVLTEVVVDS VLAVR | chr6:31802600-31803093   | x                 | x                  | x                     | x            | x               | x               | x     | x       | x          |
| VVLLGLSSIPSLV GHR      | chr10:14562824-14562872  |                   | x                  | x                     | x            | x               | x               |       | x       |            |

**Figure S1: Non-canonical protein with differential abundance in global proteomics.** The protein chr8: 73261429-73261687+ in the sectioned proteogenomic FASTA database was shown to be enriched in inflamed proximal colon samples. (a) Genomic coordinates associated with chr8: 73261429-73261687+, visualized with the UCSC Genome Browser. (b) Peptides associated with chr8: 73261429-73261687+ detected in Proteome Discoverer.

(a)

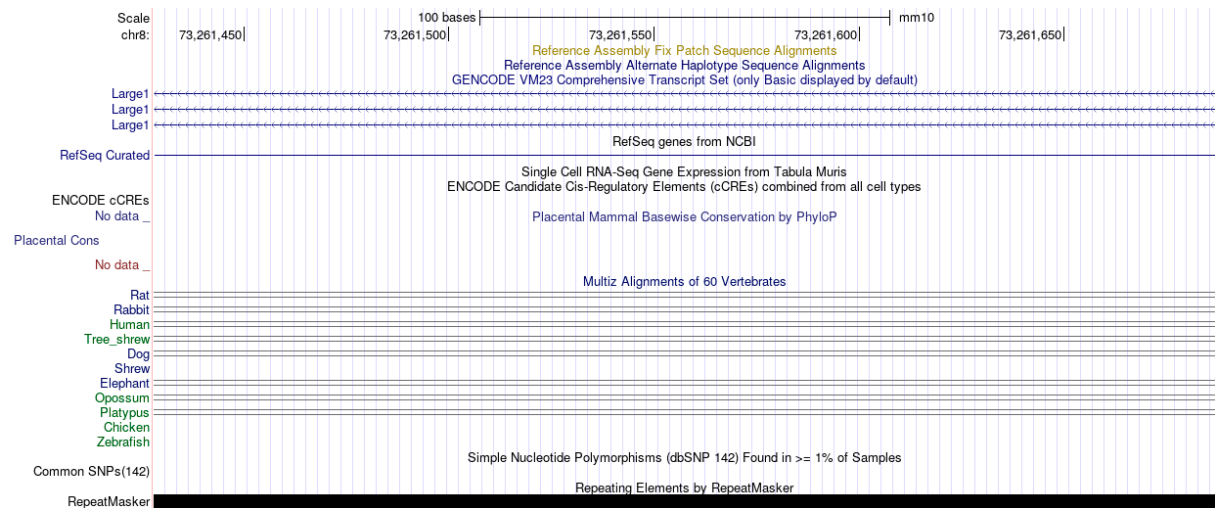

(b)

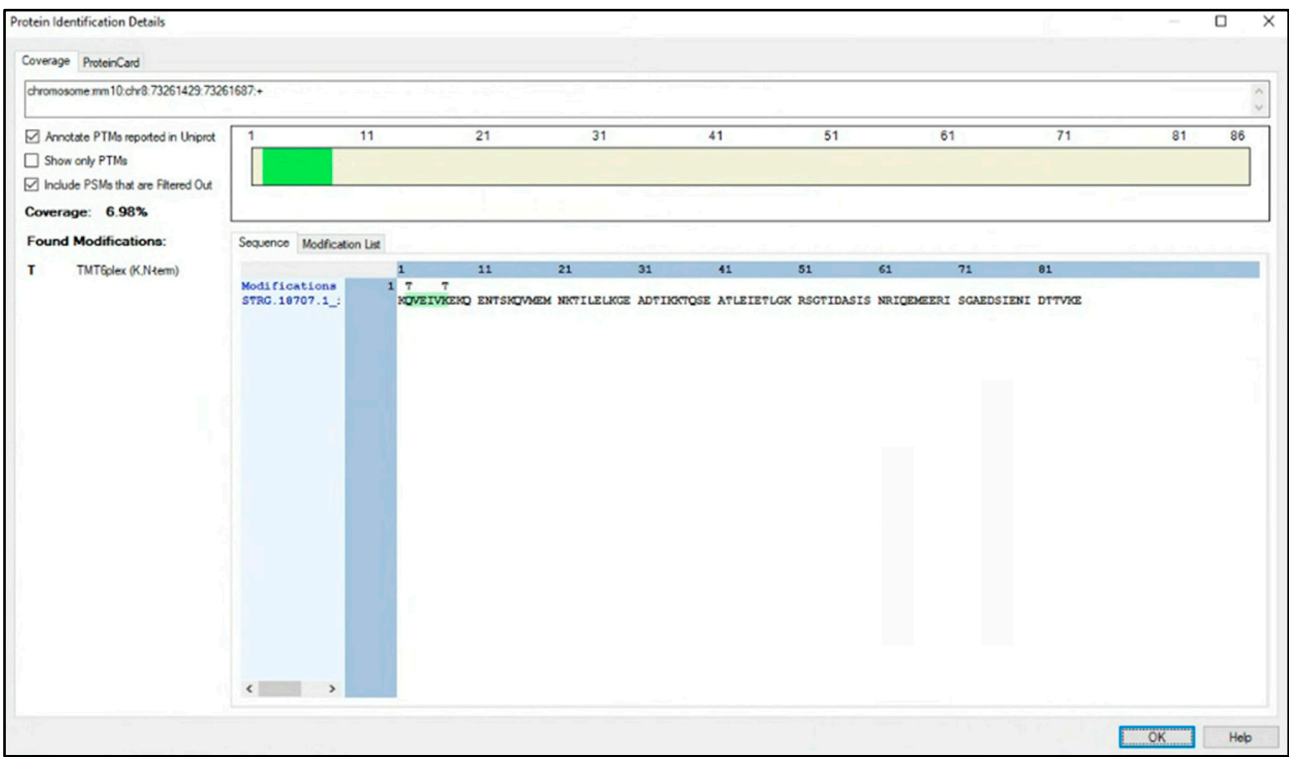

**Figure S2: MS/MS spectra of example non-canonical peptides.** Spectra of selected highly confident (p-value < 0.001) non-canonical peptides which passed PepQuery are presented here. Product ion deviations are expressed in ppm. Spectra were visualized using the Proteomics Data Viewer (PDV).

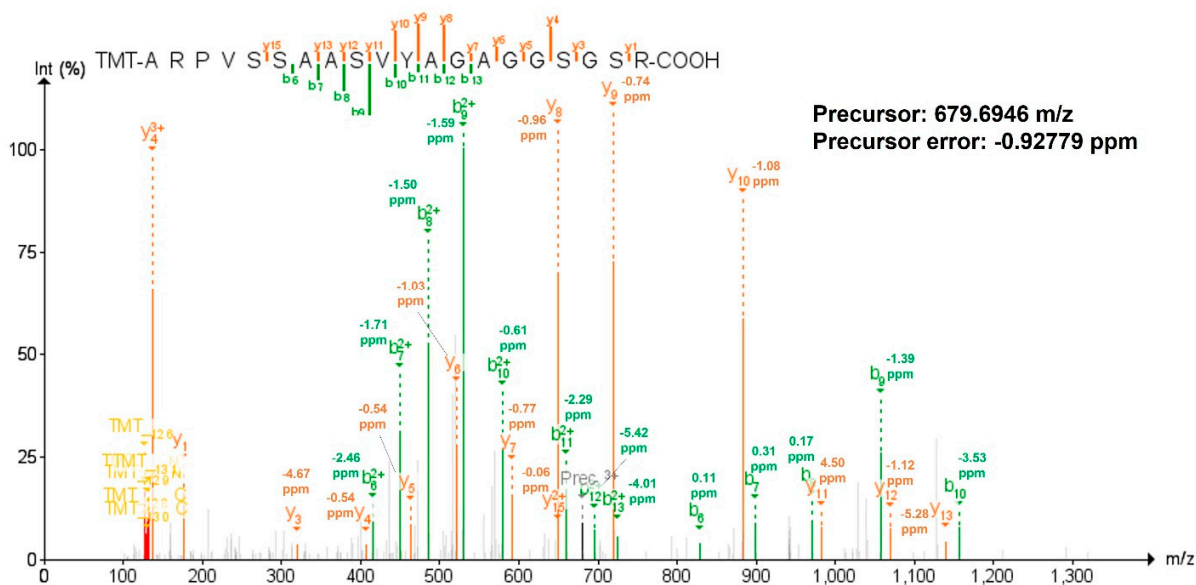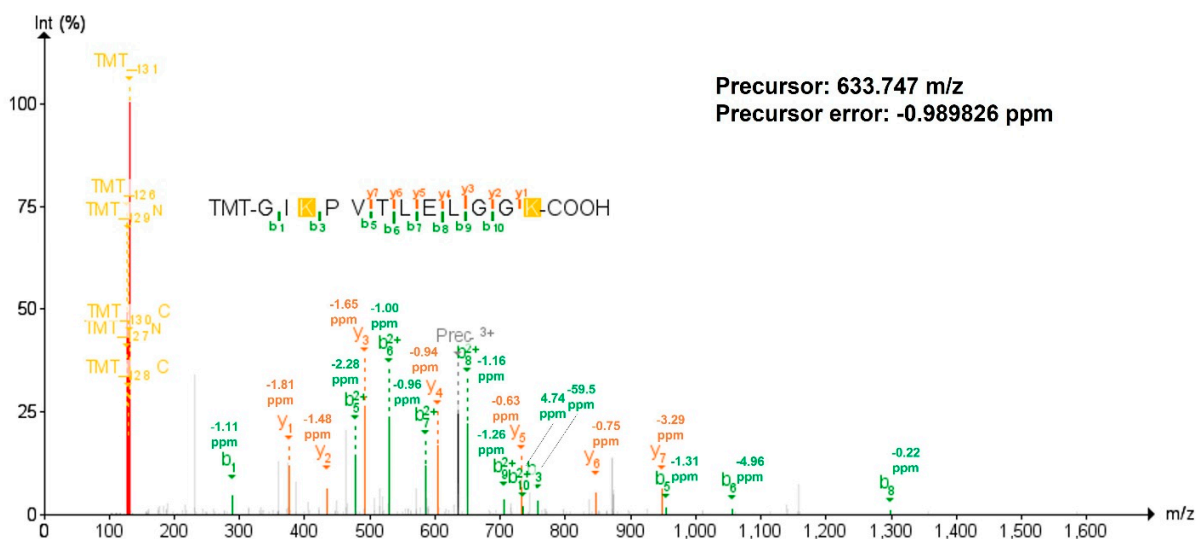

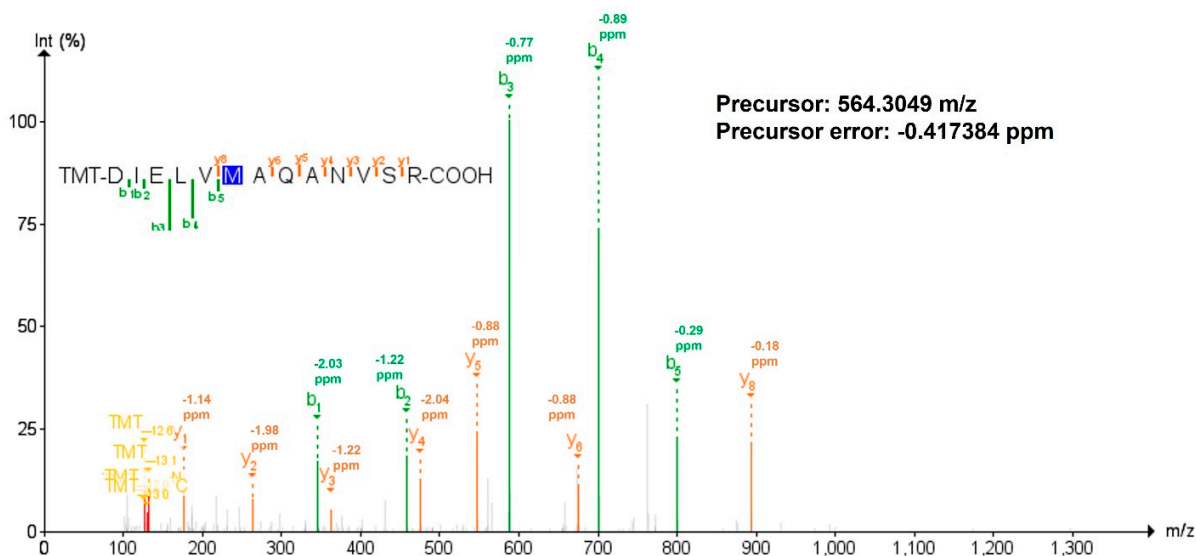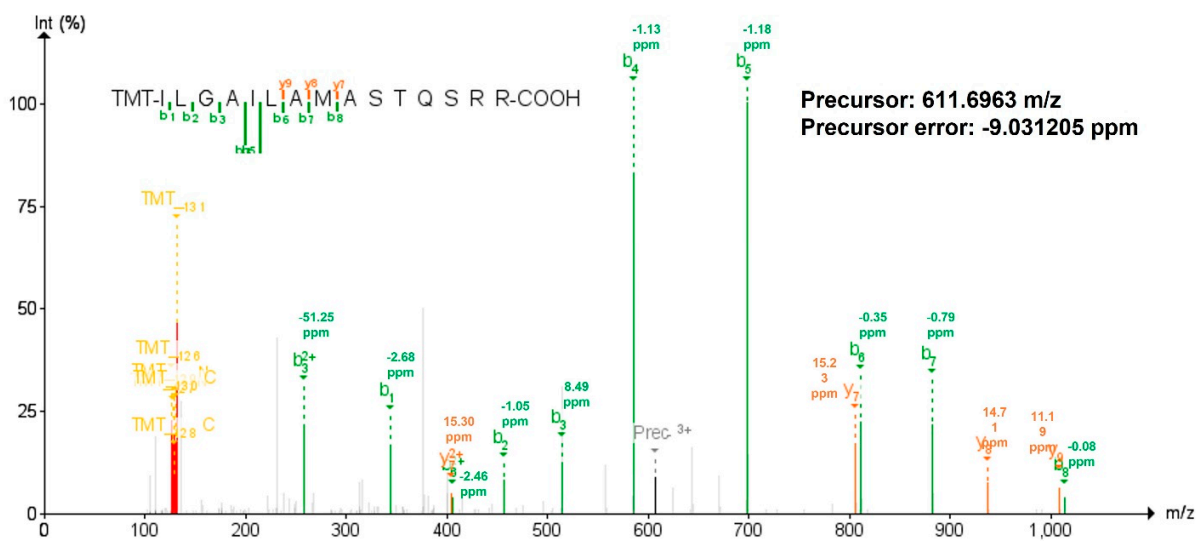

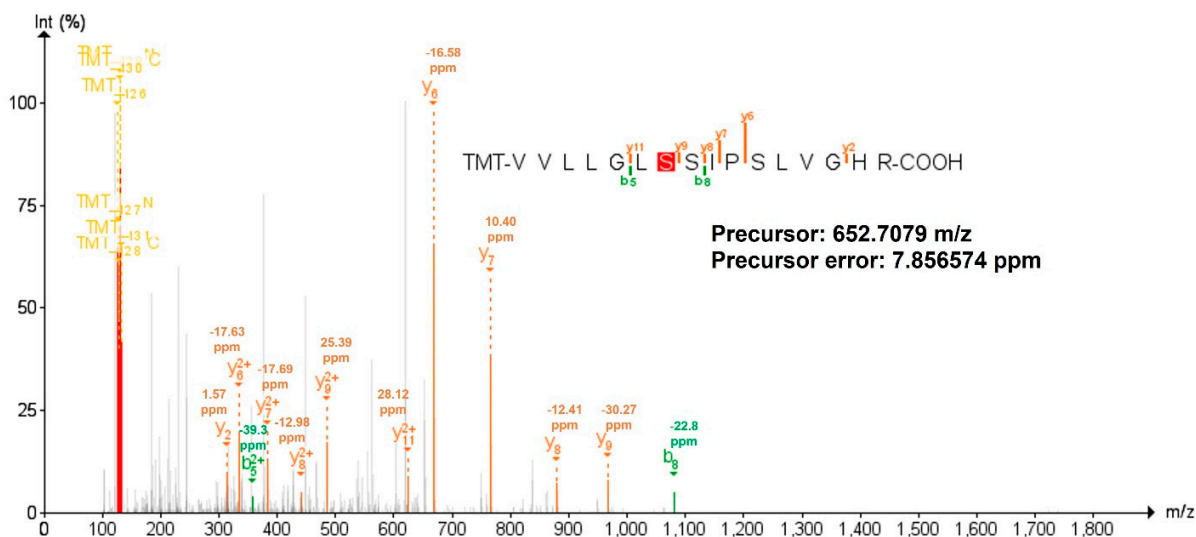

**Figure S3: Comparison of PSMs passing the Galaxy-P workflow with PSMs from MSFragger, MaxQuant.** The raw proximal colon mass spectrometry data was searched against the custom FASTA database using MSFragger and MaxQuant and compared to the non-canonical peptides that were detected in and passed the Galaxy-P workflow. In both tools, STY phosphorylation, M oxidation, and N-terminus/K TMT6plex were utilized as variable modifications, Carbamidomethylation of C was used as a fixed modification. MSFragger was run in Fragpipe along with Philosopher, Percolator and ProteinProphet were used to validate the spectra, and TMT-Integrator used to quantitate the TMT6 channels.

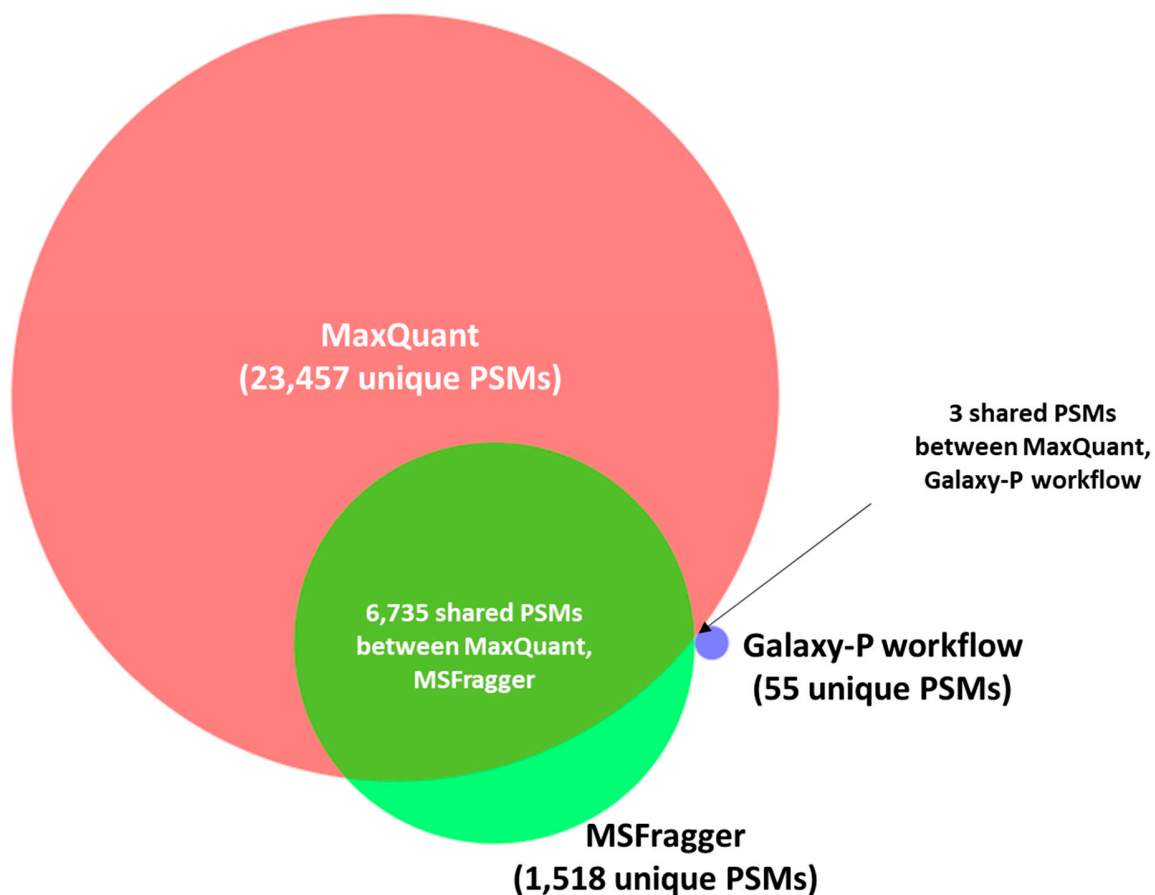

Scale chr10: 10 bases | mm10

41,967,220 41,967,225 41,967,230 41,967,235 41,967,240

A C T T T G G G A T A T T G C A G A G C C T T G C T G C C

Alt Haplotypes

Reference Assembly Fix Patch Sequence Alignments

Reference Assembly Alternate Haplotype Sequence Alignments

Sorl1

GENCODE VM23 Comprehensive Transcripts Set (only Basic displayed by default)

RefSeq Curated

RefSeq genes from NCBI

Non-Mouse RefSeq Genes

latus: Sorl1.NM\_053519

Eno: SORL1.NM\_003105

SORL1.NM\_001162737

SORL1.NM\_001305160

Single Cell RNA-Seq Gene Expression from Tabula Muris

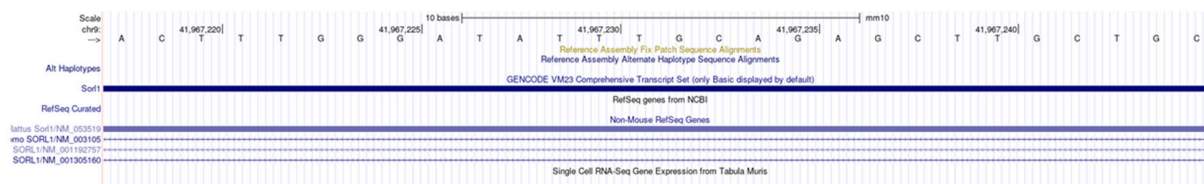

Supplement: s1 [file s1]
